# Supplementary material
Source: PubMed Central journal article supplement (PMC2529162)
Supplement: NIHMS63211-supplement-1si20051120_05.pdf [file NIHMS63211-supplement-1si20051120_05.pdf]

## Supporting Information

### A Localized Specific Interaction Alters the Unfolding Pathways of Structural Homologues

Guoqiang Xu, Mahesh Narayan, Igor Kurinov, Daniel R. Ripoll, Ervin Welker,  
Mey Khalili, Steven E. Ealick, and Harold A. Scheraga

#### A full author list for references (20), (40), (45):

- (20) Narayan, M.; Xu, G.; Ripoll, D. R.; Zhai, H.; Breuker, K.; Wanjalla, C.; Leung, H. J.; Navon, A.; Welker, E.; McLafferty, F. W.; Scheraga, H. A. *J. Mol. Biol.* **2004**, *338*, 795-809.
- (40) Brunger, A. T.; Adams, P. D.; Clore, G. M.; Gros, P.; Grosse-Kunstleve, R. W.; Jiang, J. S.; Kuszewski, J.; Nilges, M.; Pannu, N. S.; Read, R. J.; Rice, L. M.; Simonson, T.; Warren, G. L. *Acta Cryst.* **1998**, *D54*, 905-921.
- (45) Case, D. A.; Pearlman, D. A.; Caldwell, J. W.; Cheatham III, T. E.; Wang, J.; Ross, W. S.; Simmerling, C. L.; Darden, T. A.; Merz, K. M.; Stanton, R. V.; Cheng, A. L.; Vincent, J. J.; Crowley, M.; Tsui, V.; Gohlke, H.; Radmer, R. J.; Duan, Y.; Pitera, J.; Massova, I.; Seibel, G. L.; Singh, U. C.; Weiner, P. K.; Kollman, P. A. *AMBER 7*; University of California: San Francisco, 2002.
